# Supplementary material for: CUEDC1 inhibits epithelial-mesenchymal transition via the T&#x3B2;RI/Smad signaling pathway and suppresses tumor progression in non-small cell lung cancer
Source: publisher site journal article supplement (doi:10.18632/aging.103329), 2020-07-02
Supplement: Supplementary file [file aging-v12i20-103329-supplementary-material-SD1.pdf]

**SUPPLEMENTARY FIGURES**

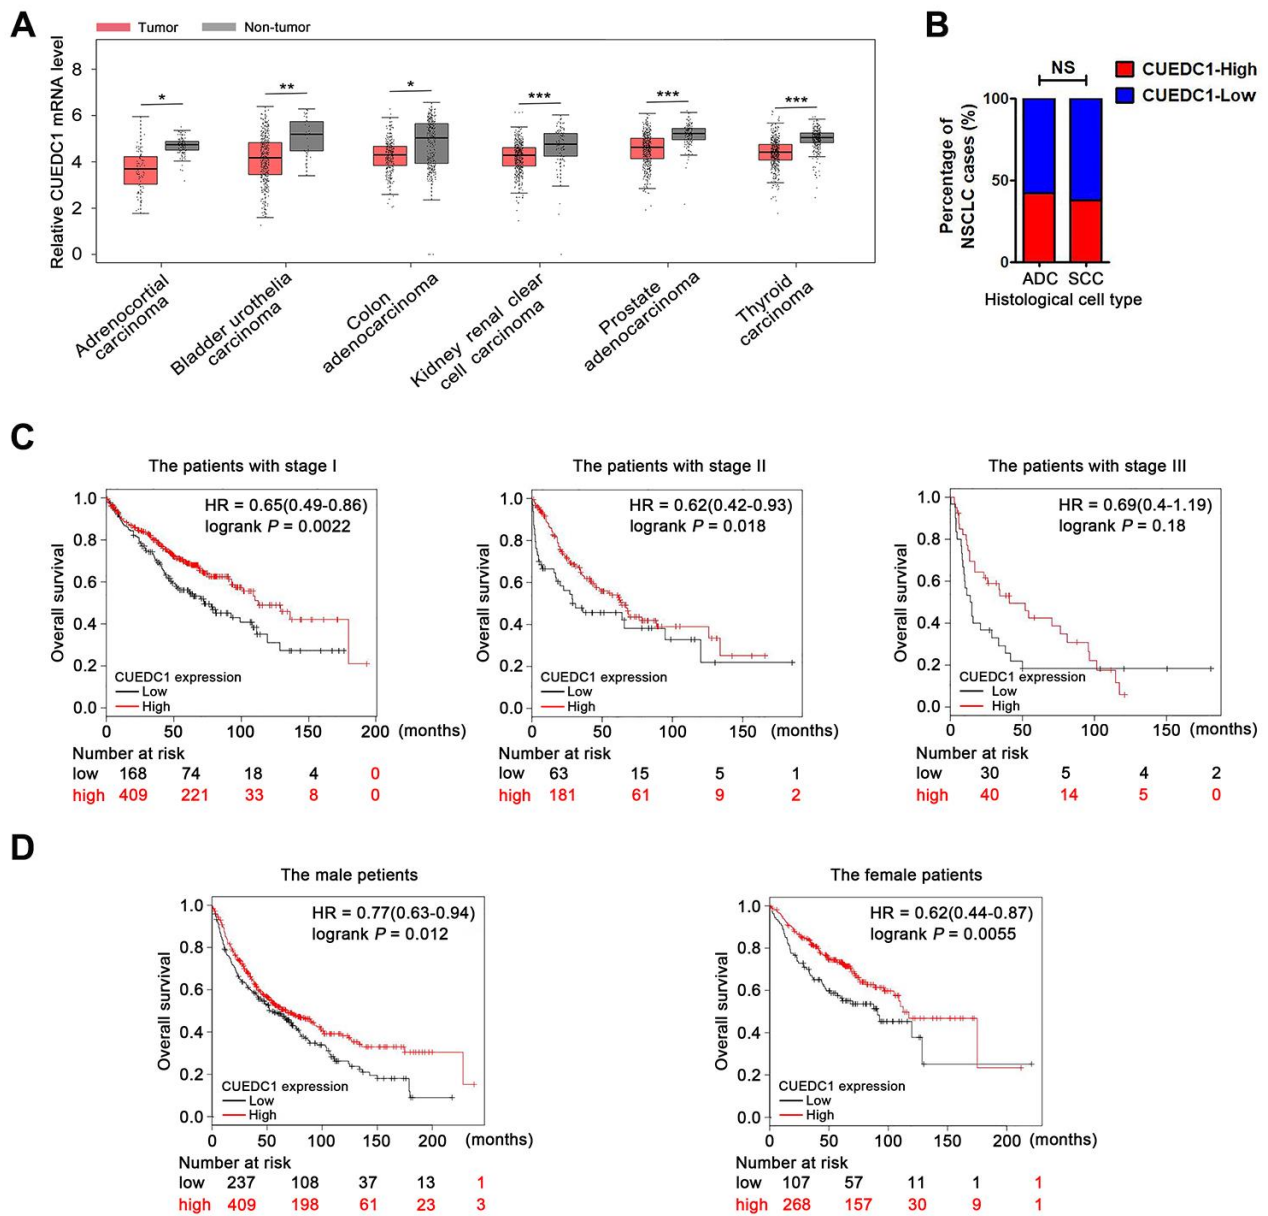

**Supplementary Figure 1. CUEDC1 expression in tumor tissues is lower than that in normal tissues and predicts good patient prognosis.** (A) GEPIA show CUEDC1 expression levels in different carcinomas. (B) IHC analysis showed that 42% of patients with adenocarcinoma had high CUEDC1 expression, whereas 38% of patients with Squamous cell carcinoma had high CUEDC1 expression. *P* values were calculated using the  $\chi^2$  test. (C, D) Correlation between CUEDC1 expression and clinical outcomes. A Kaplan–Meier plot analysis showed overall survival of lung cancer patients in different clinical stages (C) and lung cancer patients in different gender (D) depending on CUEDC1 expression. *P* values were calculated using a log-rank test.

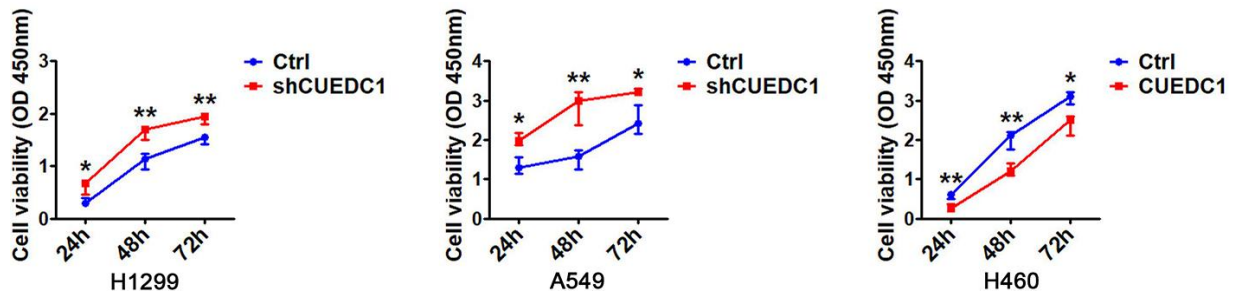

**Supplementary Figure 2. CUEDC1 inhibits NSCLC cell proliferation.** CCK-8 assays were performed in H1299 and A549 cells silenced for CUEDC1 and performed in H460 cells overexpressing CUEDC1. *P* values were calculated using Student's *t*-test. The data are expressed as the mean  $\pm$  SEM; \**P* < 0.05; \*\**P* < 0.01; \*\*\**P* < 0.001.

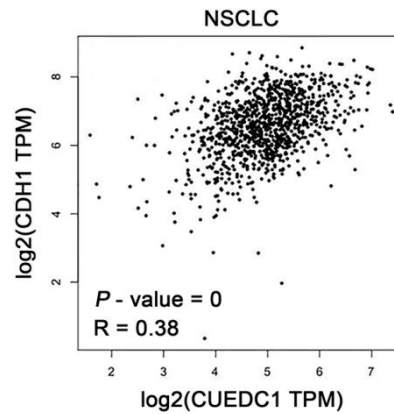

**Supplementary Figure 3. CUEDC1 expression positively correlated with E-cadherin.** The correlation between expression of CUEDC1 and E-cadherin in NSCLC samples using TCGA database.

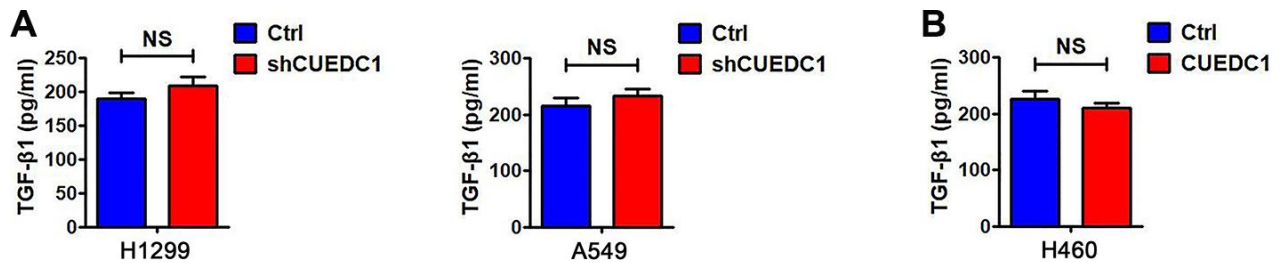

**Supplementary Figure 4. CUEDC1 had no effect on the secretion of TGF- $\beta$ 1 in NSCLC cells.** (A, B) Levels of TGF- $\beta$ 1 in culture medium of H1299/shRNA-CUEDC1 cells, A549/shRNA-CUEDC1 cells (A), and H460/CUEDC1 cells (B), and corresponding control cells (vector control). *P* values were calculated using Student's *t*-test; \**P* < 0.05; \*\**P* < 0.01; \*\*\**P* < 0.001.

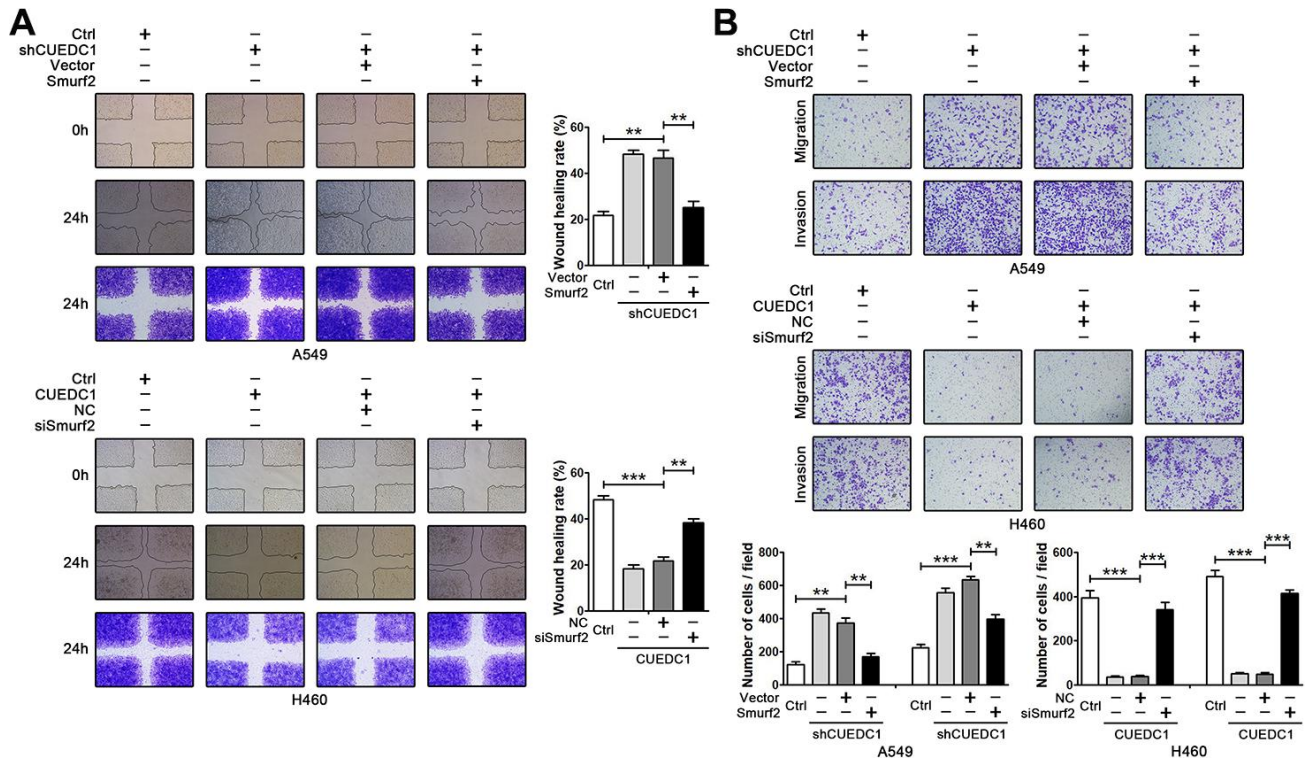

**Supplementary Figure 5. CUEDC1 inhibits metastasis in a Smurf2-dependent manner.** (A, B) After Smurf2 overexpression or knockdown, migration and invasion of A549 and H460 cells were measured using wound-healing assays (A) or transwell assays (B). The data are expressed as the mean  $\pm$  SEM. *P* values were calculated using Student's *t*-test; \**P* < 0.05; \*\**P* < 0.01; \*\*\**P* < 0.001.

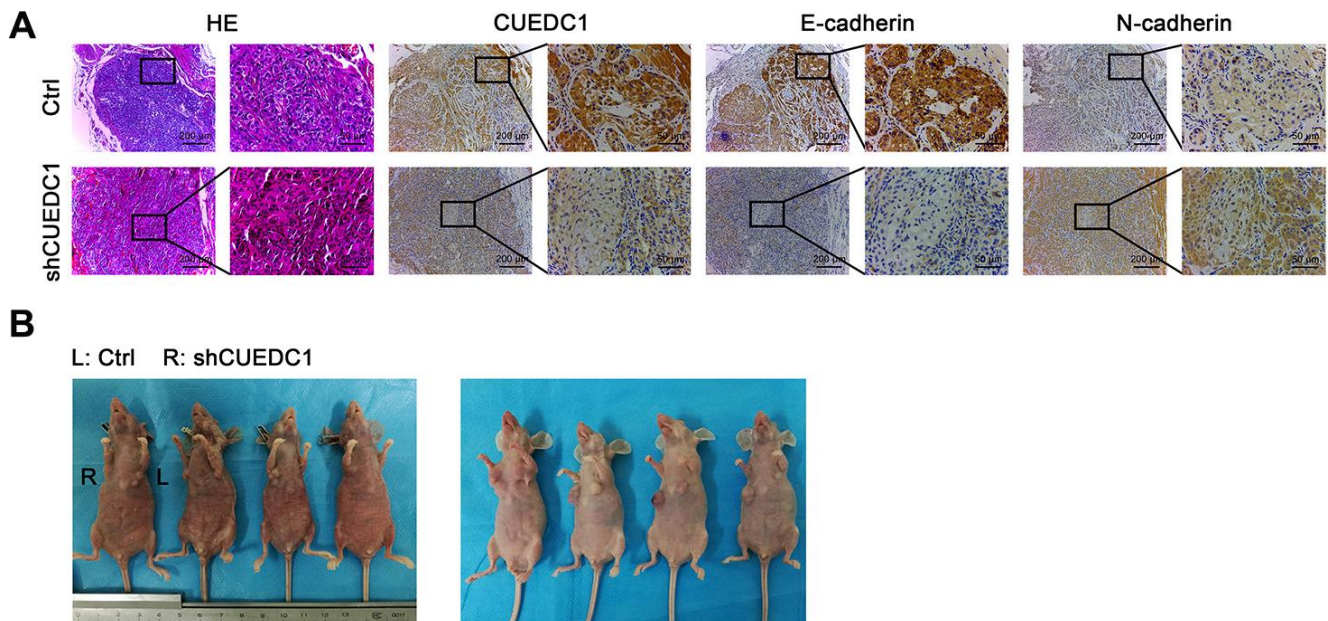

**Supplementary Figure 6. Deletion of CUEDC1 promotes the growth of tumors and the EMT process.** (A) The expression of EMT markers was determined by immunohistochemical staining in xenograft tumor of mice (magnification,  $\times 100$  and  $\times 400$ ). (B) CUEDC1 downregulation results in increased cell proliferation of NSCLC cells *in vivo*. Images of the tumor on mice.
