# Supplementary material for: CUEDC1 inhibits epithelial-mesenchymal transition via the T&#x3B2;RI/Smad signaling pathway and suppresses tumor progression in non-small cell lung cancer
Source: publisher site journal article supplement (doi:10.18632/aging.103329), 2020-07-02
Supplement: Supplementary file [file aging-v12i20-103329-supplementary-material-SD2.pdf]

## SUPPLEMENTARY TABLE

**Supplementary Table 1. The basic information of 110 patients with NSCLC for CUEDC1 immunohistochemical staining analysis.**

|                        |                         | <b>Cases (n)</b> | <b>Percentage (%)</b> |
|------------------------|-------------------------|------------------|-----------------------|
| Histological cell type | Adenocarcinoma          | 77               | 70                    |
|                        | Squamous cell carcinoma | 33               | 30                    |
| Gender                 | Male                    | 73               | 66                    |
|                        | Female                  | 37               | 34                    |
| Age (years)            | <60                     | 72               | 65                    |
|                        | ≥60                     | 38               | 35                    |
| Differentiation        | Well                    | 22               | 20                    |
|                        | Moderate                | 45               | 41                    |
|                        | Poor                    | 43               | 39                    |
| pTNM Stage             | I                       | 46               | 42                    |
|                        | II                      | 37               | 34                    |
|                        | III                     | 27               | 24                    |
|                        | IV                      | 0                | 0                     |
| pT classification      | T1                      | 37               | 34                    |
|                        | T2                      | 64               | 58                    |
|                        | T3/4                    | 9                | 8                     |
| N classification       | N0                      | 61               | 55                    |
|                        | N1                      | 14               | 13                    |
|                        | N2                      | 35               | 32                    |
| M classification       | M0                      | 110              | 100                   |
|                        | M1                      | 0                | 0                     |

Abbreviations: NSCLC = non-small cell lung cancer; pTNM stage = tumor, node, metastasis (pathological stage); pT = pathological T stage; n = number of patients.
